# Supplementary material for: Rapamycin ameliorates chitosan nanoparticle-induced developmental defects of preimplantation embryos in mice
Source: PubMed Central journal article supplement (PMC5342693; doi:10.18632/oncotarget.10813), 2016-07-24
Supplement: oncotarget-07-74658-s001.pdf [file oncotarget-07-74658-s001.pdf]

# Rapamycin ameliorates chitosan nanoparticle-induced developmental defects of preimplantation embryos in mice

## Supplementary Material

**Supplementary Table 1: Effect of in vitro development in chitosan nanoparticles treated mouse embryo**

| Treatment             | No. of morula | 100% BL                     | 80% BL                       | 30% BL                      | 0% Mo.                     |
|-----------------------|---------------|-----------------------------|------------------------------|-----------------------------|----------------------------|
| Control               | 59            | 48 (80.9±1.4 <sup>a</sup> ) | 8 (14.4±2.1 <sup>b</sup> )   | 2 (3.0±1.8 <sup>c</sup> )   | 1 (1.7±1.7 <sup>b</sup> )  |
| CSNPs                 | 66            | 29 (45.2±5.8 <sup>c</sup> ) | 20 (28.2±5.3 <sup>a</sup> )  | 9 (13.5±2.3 <sup>a</sup> )  | 7 (10.9±4.3 <sup>a</sup> ) |
| Rapamycin 5 + CSNPs   | 71            | 40 (58.8±4.9 <sup>b</sup> ) | 20 (26.0±4.6 <sup>a</sup> )  | 7 (9.8±2.3 <sup>b</sup> )   | 4 (5.4±1.9 <sup>ab</sup> ) |
| Rapamycin 10 + CSNPs  | 87            | 52 (60.5±2.6 <sup>b</sup> ) | 24 (27.1±2.5 <sup>a</sup> )  | 7 (7.6±3.1 <sup>b</sup> )   | 4 (4.8±1.7 <sup>ab</sup> ) |
| Rapamycin 50 + CSNPs  | 82            | 47 (57.4±3.6 <sup>b</sup> ) | 22 (26.7±2.5 <sup>a</sup> )  | 8 (9.9±1.9 <sup>b</sup> )   | 5 (6.0±0.7 <sup>ab</sup> ) |
| Rapamycin 100 + CSNPs | 79            | 47 (60.3±2.9 <sup>b</sup> ) | 18 (21.6±3.7 <sup>ab</sup> ) | 9 (11.8±1.7 <sup>ab</sup> ) | 5 (6.3±0.8 <sup>ab</sup> ) |

**Supplementary Table 2: Primers used for quantitative real-time polymerase chain reaction**

| Gene  | Primer                  | Gene       | Primer                  |
|-------|-------------------------|------------|-------------------------|
| Atg4a | F CCCTCACACAACCCAGACTT  | Ip3R type1 | F CTAACCCCTCTCCTGGTCCT  |
|       | R CCCCTGTGGTTGTCACTTCT  |            | R CACCAAAGCCACCAAGAACT  |
| Atg4b | F CCACAAGGTAGCAAGAGA    | Junk1      | F GCCACAAAATCCTCTTTCCA  |
|       | R GAAGTCAAGGGACAAGATATG |            | R CACATCGGGGAACAGTTTCT  |
| Atg5  | F GGAGAGAAGAGGAGCCAGGT  | LC3        | F TTCTTCCTCCTGGTGAATGG  |
|       | R TGTTCCTCCACTGAACTTG   |            | R GTGGGTGCCTACGTTCTCAT  |
| Atg6  | F GTCTTATGAGATGAGGAATG  | mTOR       | F ACACAGTAATCCTTCAGA    |
|       | R AATGGCAGGATACTTCTT    |            | R GCAATGTTTATGATGAGTTT  |
| Atg7  | F CAGTAGCCTGTAGAATAAC   | Perk       | F GGGAAAACGGTTCTGAGACA  |
|       | R GTAGGTGTGTCTGTAATC    |            | R GCTGACCAGCTAGTCTTGGG  |
| Atf6  | F AACCAGTCCTTGCTGTTGCT  | Sirtuin-1  | F AAGGAGCAGATTAGTAAGC   |
|       | R CTTCTTCTTGCGGGACTGAC  |            | R GCACCGTGGAATATGTAA    |
| Bax   | F CGAGCTGATCAGAACCATCA  | Sirtuin-3  | F TACAGGCCCAATGTCCTCA   |
|       | R GAAAAATGCCTTTCCCCTTC  |            | R ACAGACCGTGCATGTAGCTG  |
| Bcl2  | F TAAGCTGTCACAGAGGGGCT  | Sirtuin-6  | F CTGGTCTGGAACCTCACTGCT |

|               |   |                              |        |   |                       |
|---------------|---|------------------------------|--------|---|-----------------------|
|               | R | TGAAGAGTTCCTCCACCACC         |        | R | CGGGTGTGATTGGTAGAGAG  |
| Beclin1       | F | ACAGTTCTATAACAAGTGA          | Tet-1  | F | GCCTGTTTCATTTCCGTTGT  |
|               | R | GGGTTCTTTGCTATAACAT          |        | R | GTCCCTGACGTAGGACCAAAA |
| Calpain2      | F | CACCCTCACCTGTGACTCCTAT<br>AA | Tet-2  | F | GTTCTCAACGAGCAGGAAGG  |
|               | R | ATCCTCCTCATCTTCGTCTT         |        | R | TGAGATGCGGTACTCTGCAC  |
| Caspase<br>33 | F | AGGGGTCAATTTATGGGACA         | Tet-3  | F | GGTCACGCATCGTCCTTATT  |
|               | R | TACACGGGATCTGTTTCTTTG        |        | R | TTTTAGGATGGGCGTGTTTC  |
| Chop          | F | ACAGAGGTCACACGCACATC         | Xbp1   | F | GAGCAGCAAGTGGTGGATTT  |
|               | F | CTCCGGAGAGACAGACAGG          |        | F | CTCTGGGGAAGGACATTTGA  |
| c-Myc         | R | CAACGTCTTGGAACGTCGTCAG<br>A  | Dnmt1  | R | GCTGCTACCAAGGACTAG    |
|               | F | TCGTCTGCTTGAATGGACAG         |        | F | ACAAGACTTCAAATGATGGG  |
| Cycin<br>D1   | R | GCGTACCCTGACACCAATCT         | Dnmt3a | R | ACTTGGAGAAGCGGAGTGAA  |
|               | F | ATCTCCTTCTGCACGCACTT         |        | F | CTGTTCTTTGCCCTCTCCTG  |
| Ezh2          | R | TGTGGAGTTGGTAAATGC           | Dnmt3b | R | GATGCTATTGTGAATGTG    |
|               | F | TTTCTTCTTTTCATCTGGAT         |        | F | AGGAAGACTTAAACCATAA   |
| Grbarab       | R | CAGCAGGAGGGGTAATGGTA         | Eed5   | R | GGGCACAGAGATGAAGT     |
|               | F | CCAATGTCAATCCCTTCCAC         |        | F | CCAGGTTTCCAGCATAAC    |
| Grp78         | F | TCTGGTGATCAGGATACAGGTG       | Suz12  | F | GAAGTGGAGCAGCAGAGAA   |
|               | R | TTCAGCTGTCACCTCGGAGAATA      |        | R | CTACAAACAGCATAACAGGCA |
| Figla         | F | ACAGAGCAGGAAGCCCAGTA         | Lxh8   | F | CAGTTCGCTCAGGACAACAA  |
|               | R | ACTCGCACAGCTGGTAGGTT         |        | R | AGCCATTCTTCCAACATGG   |
| Foxo3a        | F | GATGATGATGGACCCCTGTC         | Nobox  | F | ACAAACGCCATGAGATTTCC  |
|               | R | TCTTGGCGGTATATGGGAAG         |        | R | AACAGGGCCAGGTTCTAGGT  |

**Supplementary Table 3: Primers used for quantitative real-time polymerase chain reaction to quantify mitochondrial DNA copy number and functional regulation**

|                               | Gene symbol            | Primer                  |                         | Gene symbol  | Primer                 |
|-------------------------------|------------------------|-------------------------|-------------------------|--------------|------------------------|
| Mitochondrial DNA copy number | mCytb                  | F ATTGACCTACCTGCCCCATC  | Mitochondrial activity  | Rhot2        | F CAGTTACCCGCGAGAAGAAG |
|                               |                        | R CTCGTCCGACATGAAGGAAT  |                         |              | R GGCTGTCAGCATTCACTTCA |
|                               | Actin                  | F TCGCCATGGATGACGATA    |                         | Cytochrome C | F TTCCACAACCCTCATGTGAA |
|                               |                        | R CACGATGGAGGGGAATACAG  |                         |              | R TAAGGGTCCAAAACCAGTGC |
| Mitochondrial activity        | Mpv17                  | F TCGGAGGCTGGTACAAAAGTT |                         | Atp5b        | F TGGGAAAATCGGACTCTTTG |
|                               |                        | R ATTGTCCTGGGCTGACATTC  |                         |              | R AGTAACCACCATGGGCTTTG |
|                               | Cbr1                   | F AGTGGTGAATGTGTCCAGCA  |                         | Atp synthase | F GCCCTCGGTAATGCTATTGA |
|                               |                        | R CAGGACTGTCACCCCAATCT  |                         |              | R CACAGAGATTCGGGGGATAA |
| Imp1                          | F GGCATCCAAAGAGGTGACAT | Sco1                    | F AGTGGCCTTGAAAGAAAGCA  |              |                        |
|                               | R ACATGACCTGTTGGCACGTA |                         | R GTAGCCTGCCCTTGCTATTG  |              |                        |
| Mtfp1                         | F GCTGTGGTGTGGTTGAGCTA | Sco2                    | F CCTTCGCTGAACTTGTCTCTC |              |                        |
|                               | R ACACAGACGGTTGATGGTGA |                         | R CCCTAGAGCCAGTAGCATCG  |              |                        |

**Supplementary Table 4: Primers used for quantitative real-time polymerase chain reaction for placenta analysis**

| Gene       | Primer                 | Gene          | Primer                               |
|------------|------------------------|---------------|--------------------------------------|
| Mash2      | F AGTTCCCAGCACCCATGTAG | Slc22a3       | F CATTGCGCCAAATTTTCT                 |
|            | R GGGTGGTTTGCTTGCAGTAT |               | R TCACGATCACGAAGCAAGTC               |
| Cdx2       | F TGTGATTGGAGGTTAAAGTG | Slc40a1       | F GTCATCCTCTGCGGAATCAT               |
|            | R CCCAAAACAAACCTCACCAT |               | R AAGGACCCATCCATGGTACA               |
| Hand1      | F TGGACGTCTGAACCTTCTC  | Slc2a3        | F CGCCAATGGCTTTTAAGTGT               |
|            | R AAGGCTGGAGATGACACGAA |               | R CCCCTTCCCTCCCAATATAA               |
| Gys1       | F GGGACACTGTGCATTGTTTG | Ig-DMR        | F TATATATGGATGTATTGTAATATAGG<br>TTAG |
|            | R CCGATTCGTCTAATGGTGCT |               | R CACTTTTACTATAAAACACTTAAC<br>TC     |
| Gcm1       | F CGATGTGAAACTGCCTCAGA | Lit1-<br>DMR  | F TAAGGTGAGTGGTTTAGGAT               |
|            | R TGTCGTCCGAGCTGTAGATG |               | R CCACTATAAACCACACATA                |
| Prl8a8     | F CCTCAGTGATGGAAGTCAA  | Meg1-<br>DMR  | F AAGTTTGTGTTTGTGAGTTGGTTT<br>T      |
|            | R GAAGCTTTCTCCCACAGCAG |               | R AATATAATTCACCACCCATTCTAA           |
| Gjb3       | F CTTCTTCCCCATCTCCAACA | Peg3-<br>DMR  | F GGTGGAGATAGGTTTGTGATAG             |
|            | R AGGCTACATGCAGGATGACC |               | R AAAACCAAATACAATCCAAAATC            |
| Gbe1       | F CTCCTGGAGATTGACCCGTA | Peg10-<br>DMR | F TGGAAAGTTGTAGGAGAGTAATTA<br>AA     |
|            | F TCGATCCCACCTTCATTCTC |               | F CACAAACTATTACTAAACACCCAT<br>TC     |
| Atp2a<br>3 | R TGACCCCCAGTAACAAAAGC | Rafg1-<br>DMR | R AGTTGGGGAGGTGTGTTATATTAG<br>A      |
|            | F GAGGAGATGCAGGAGAGTGG |               | F AAACCAAATATCAATCCTAACCT<br>C       |

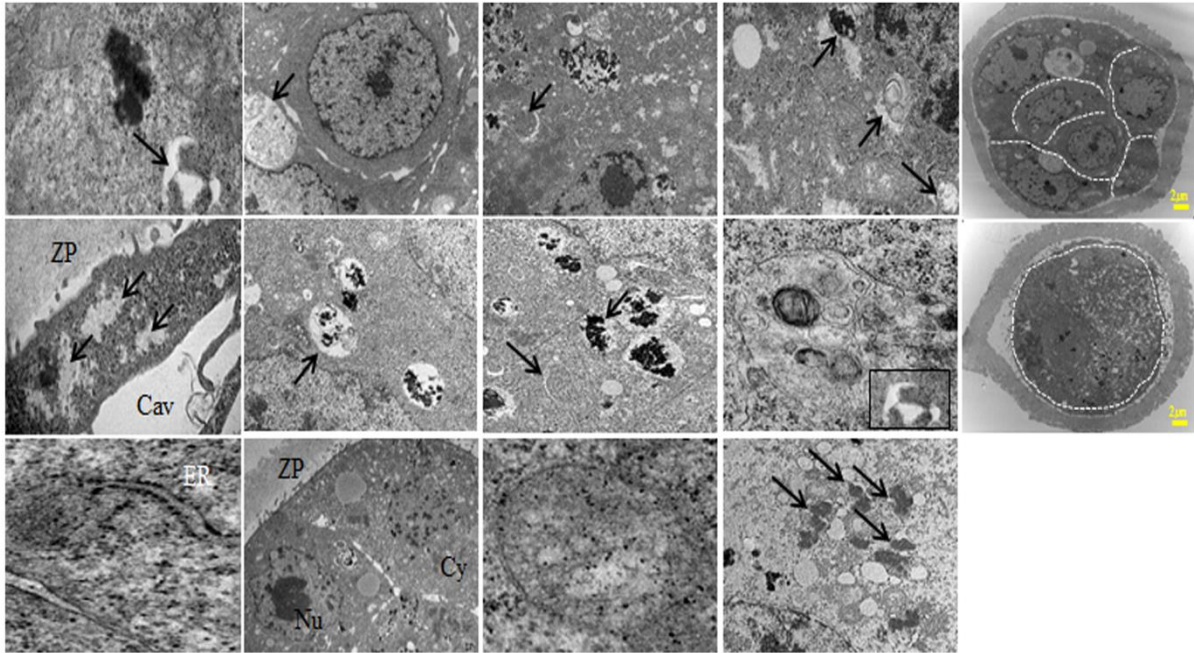

**Supplementary Figure 1: The effect of rapamycin on CSNPs-induced autophagy in blastocysts.**

Morula-stage embryos were cultured with CSNPs. CSNPs-treated embryos exhibited various types of structural and cellular damages related to autophagy.

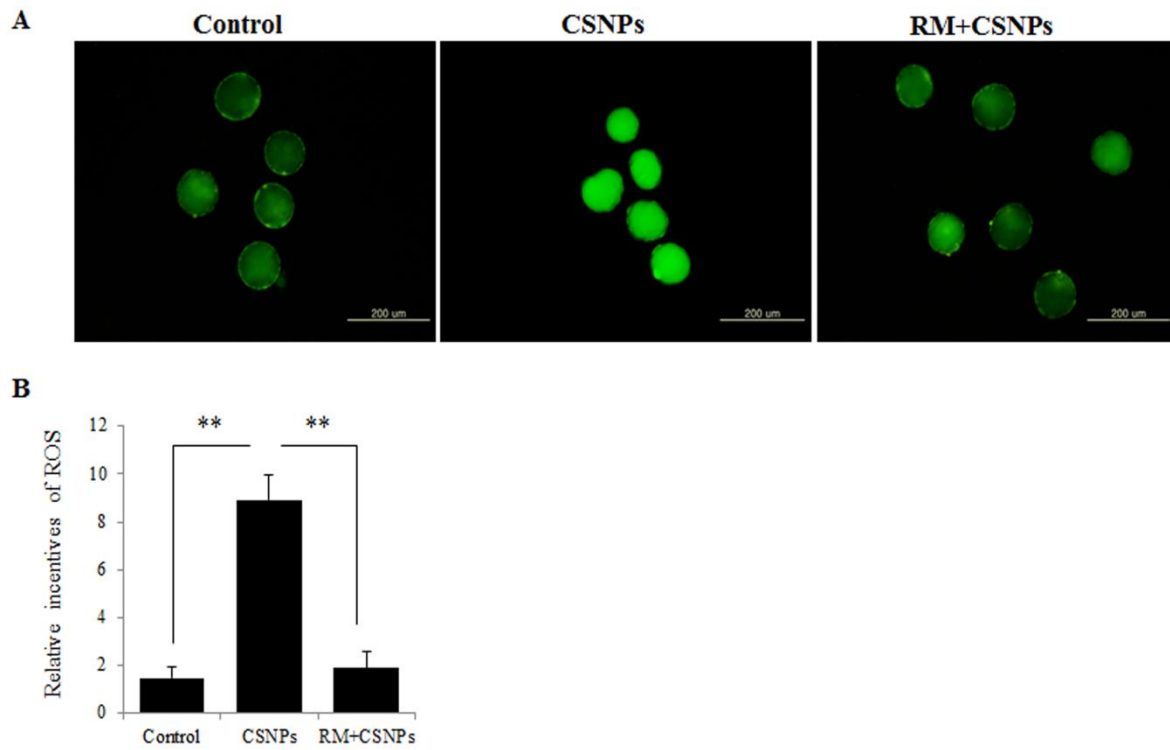

**Supplementary Figure 2: Determination of ROS signals.** (A). Levels of cytoplasmic ROS generation were measured (green color) after morula stage embryos were cultured either in CSNPs or rapamycin +CSNPs for 24h. (B) Statistical analysis of ROS intensity. RM indicates rapamycin.

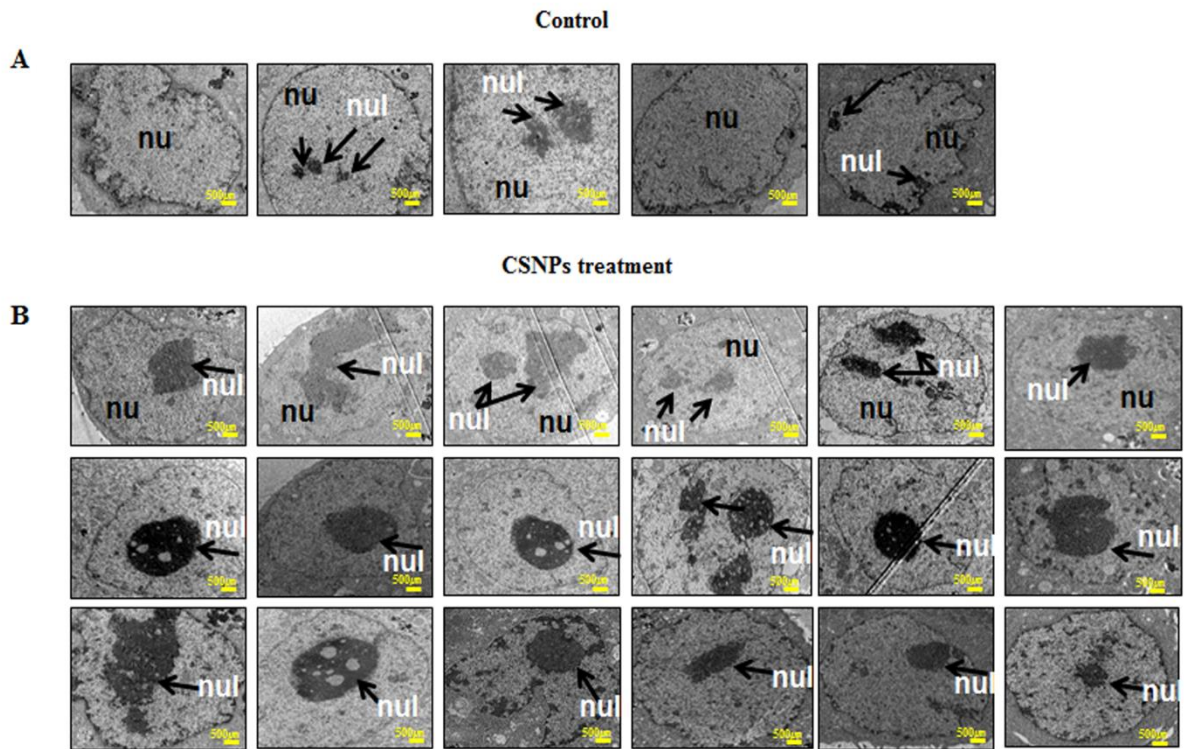

**Supplementary Figure 3: Ultrastructure of heterochromatin condensation. (A) Control (B) CSNPs-treated embryos.**

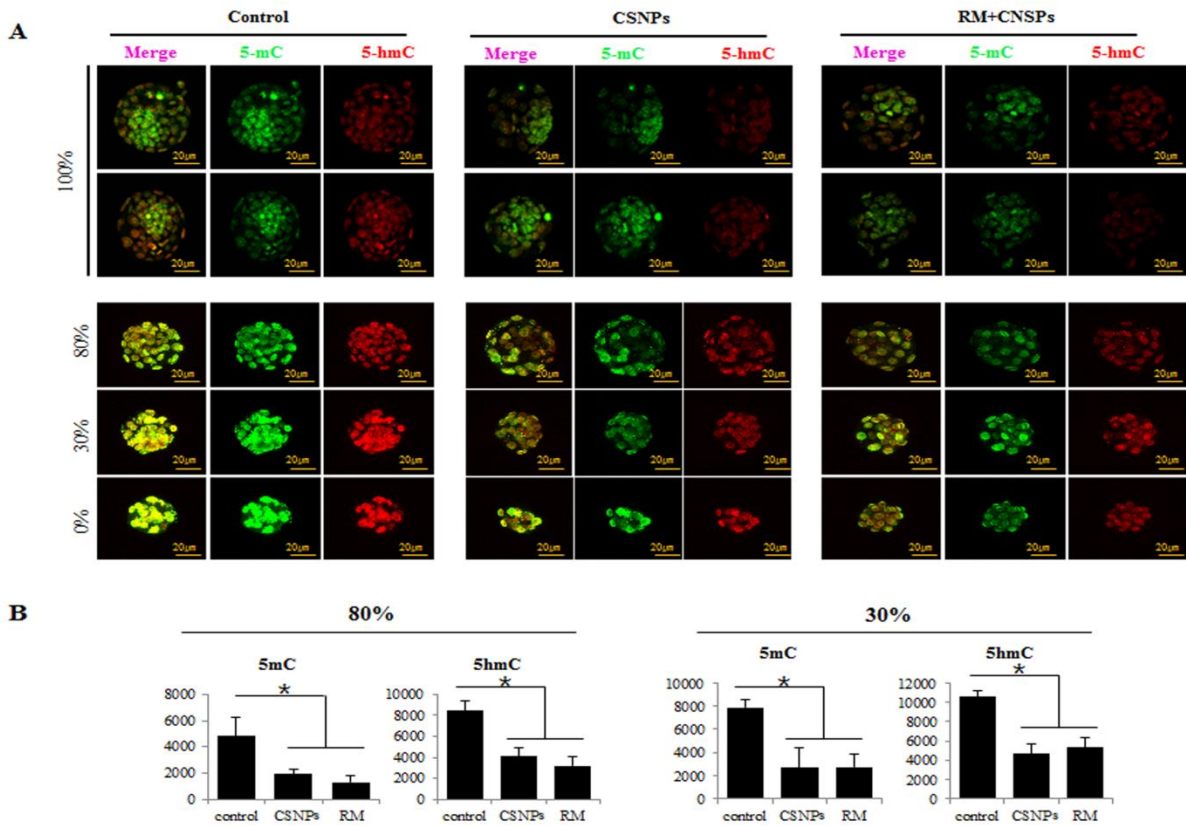

**Supplementary Figure 4: Comparison of 5-hmC and 5-mC signal intensity in blastocyst with different cavity size.** (A) 5-hmC and 5-mC staining patterns of the control, the CSNPs- and rapamycin+CSNPs-treated group. (B) Measurement of the fluorescence intensities of 5-hmC and 5-mC signals. RM indicates rapamycin.



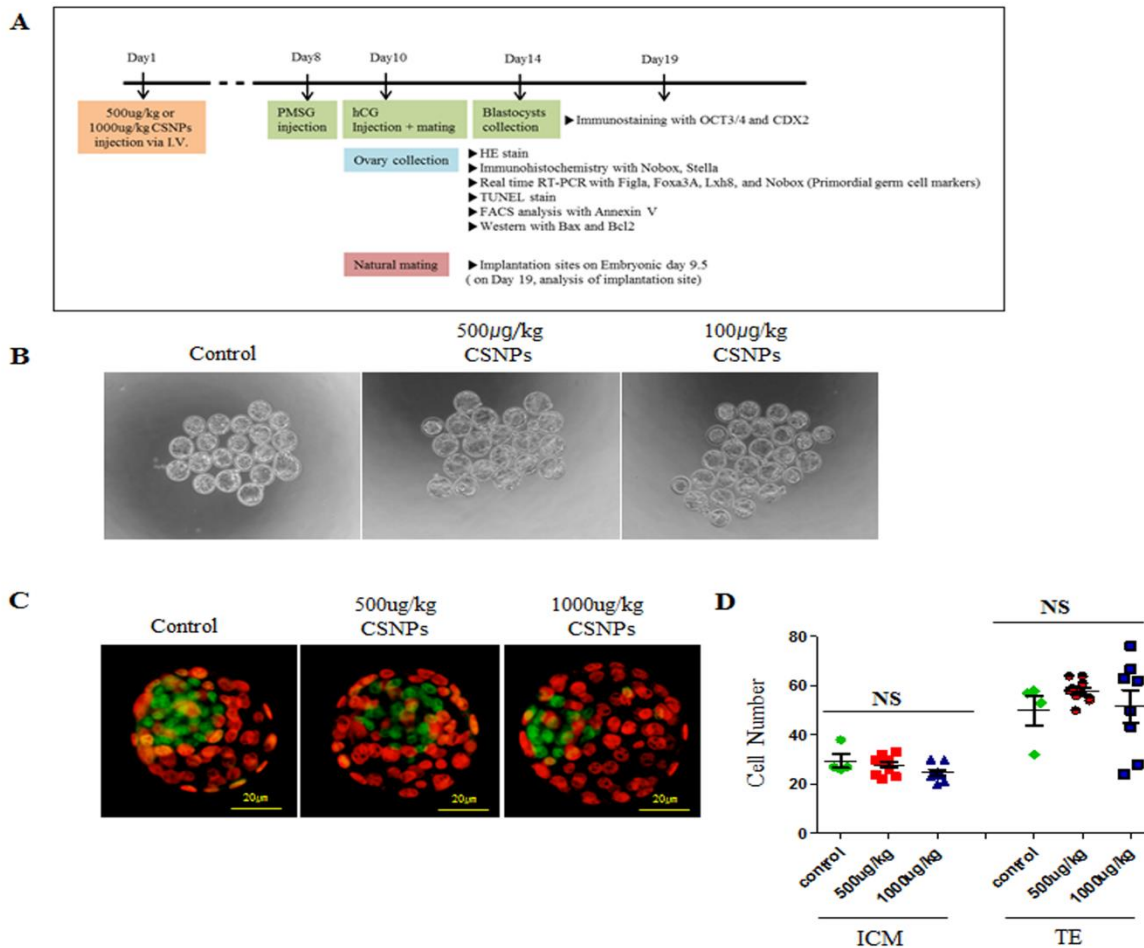

**Supplementary Figure 5: Quality analysis of *in vivo* blastocyst embryos recovered from CSNPs-injected female mice.** At 10 days after CSNPs injection, female mice are mated with fertile male mice and checked vaginal plugs at next morning. Three days later, blastocyst embryos were recovered from Control and CSNPs-treated female mice. (A) Time schedule for *in vivo* studies. (B) Microscopy picture of blastocyst stage embryos. (C) Cdx2 (red color) and Oct3/4 (green color) staining using CDX2 and OCT3/4 antibodies indicate (TE) and inner cell mass (ICM), respectively. (D) Statistical analysis of TE and ICM cell numbers. There is no difference between control and CSNPs-injected blastocyst stage embryos.

**A**

|          | No. of embryos transferred | No. of pregnancy | No. of offspring |
|----------|----------------------------|------------------|------------------|
| Control  | 20                         | 4                | 30               |
| CSNPs    | 20                         | 6                | 20               |
| RM+CSNPs | 20                         | 6                | 28               |

**B**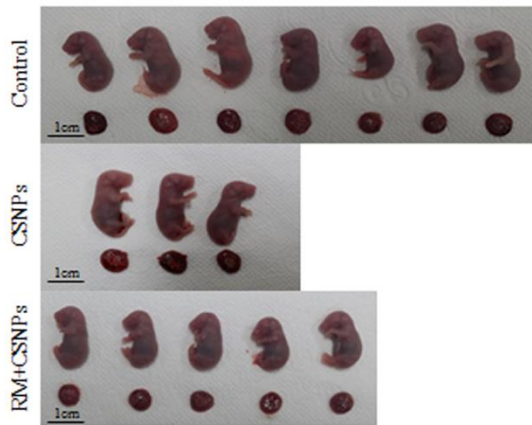**C**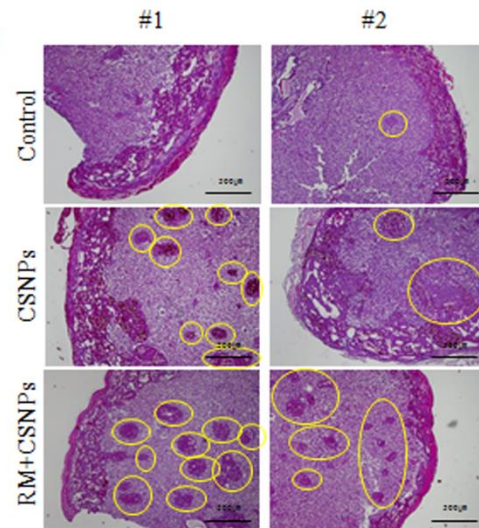

**Supplementary Figure 6: Fertility test in CSNPs- or rapamycin+CSNPs treated embryos.** Morula-stage embryos were cultured with CSNPs or rapamycin+CSNPs for 24h. At day 20 after embryo transfer, each offspring were recovered from the uteruses of recipients treated with CSNPs or both rapamycin and CSNPs. (A) Embryo transfer data in control, CSNPs, rapamycin+CSNPs treated groups. (B) A representative picture of offspring and placenta. (C) PAS staining of placentas in control, CSNPs, rapamycin+CSNPs treated groups. Of note, control shows normal spongiotrophoblast areas, whereas CSNPs-treated groups show mis-location of spongiotrophoblast. RM indicates rapamycin.

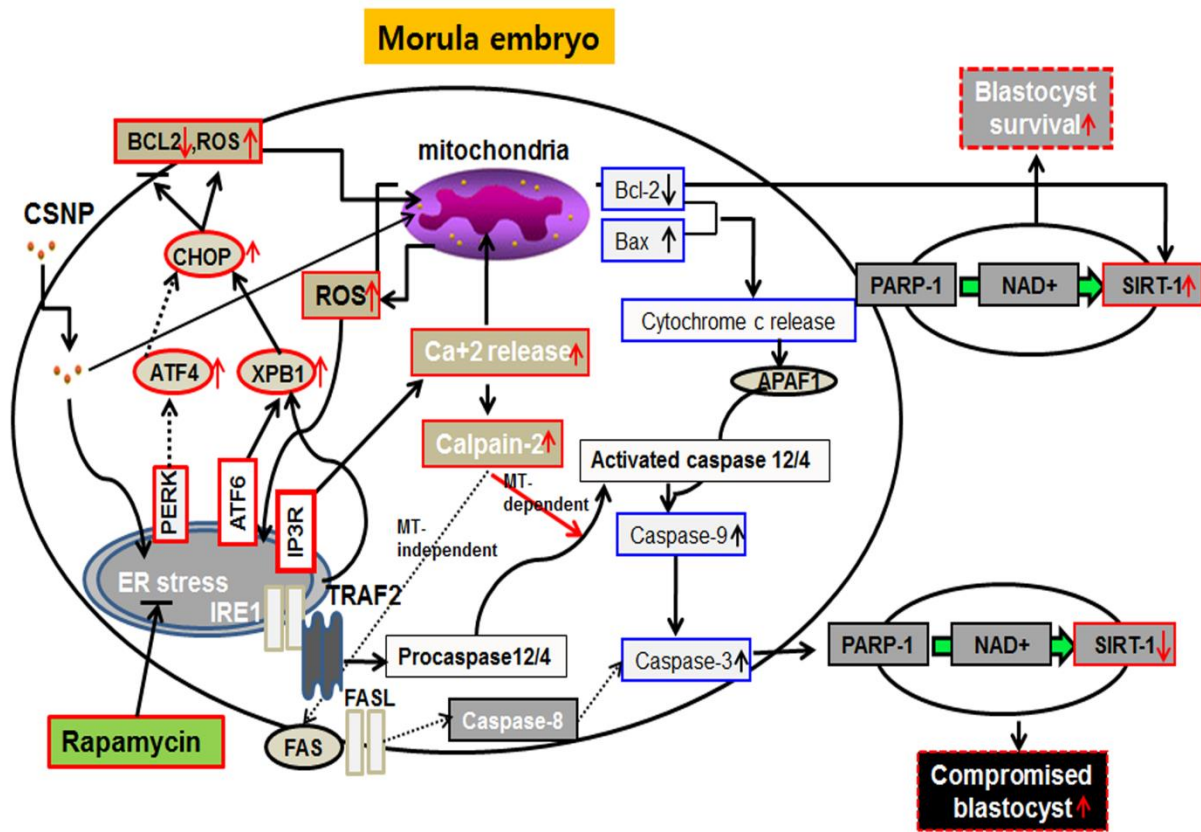

Supplementary Figure 7: The hypothetical mechanisms for explaining CSNPs-induced toxic effects in preimplantation mouse embryos.
